# Supplementary material
Source: ML conference proceedings conference paper supplement (https://proceedings.neurips.cc/paper_files/paper/2018/hash/4e4e53aa080247bc31d0eb4e7aeb07a0-Abstract.html)
Supplement: Supplementary file [file 4e4e53aa080247bc31d0eb4e7aeb07a0-Supplemental.zip]

---

# Supplemental Material

---

## 1 THEORETICAL JUSTIFICATION

In this section we define the conditions and prove the theorem stated in the main text. Techniques are similar to [1].

Recall that we say a measurable set  $U$  is a support set of probability measure  $p$  iff  $p(U) = 1$ . A measurable set  $U$  is called  $p$ -dense iff for every point  $z \in U$ , for any neighborhood  $U(z, \epsilon)$  of  $z$ , we have  $p(U(z, \epsilon)) > 0$ .

Fixing a task  $\mathcal{T}$ , our discriminator first compresses each data point  $\mathbf{x}$  to a latent vector representation  $\mathbf{z} = f(\mathbf{x})$ , and then pass to a linear classifier, with weights  $\mathbf{w}_i, i = 1, 2 \dots K$ . We further assume  $\mathbf{w}_i, i = 1, 2 \dots K$  are bounded by a uniform constant  $C$ .

we denote  $p_{\mathcal{T}}(\mathbf{z})$  the distribution of latent representations of task  $\mathcal{T}$ . We assume that  $p_{\mathcal{T}}$  has compact support  $B$ . Without loss of generality, we can also assume  $B$  is convex, otherwise we can take its convex closure. We also denote the probability distribution of latent distributions of class  $i$  as  $p_{\mathcal{T}}^i(\mathbf{z}), i = 1 \dots K$ . We define an open domain  $U \subset \mathbb{R}^n$  is an  $\epsilon$ -support of a probability measure  $p$ , if  $p(U) > 1 - \epsilon$ . We assume that there exists some very small  $\epsilon > 0$ , we have a set of  $U_i, i = 1, 2 \dots K$ , such that  $U_i$  is an  $\epsilon$ -support of  $p_{\mathcal{T}}^i$  for all  $i = 1, 2, \dots K$ . We also assume all  $U_i$  is disjoint from each other. For the adapted generator  $G_{\mathcal{T}}(\mathbf{z})$ , we denote its corresponding distribution in latent space as  $p_{\mathcal{T}}^G(\mathbf{z})$ . Assume  $p_{\mathcal{T}}^G$  has  $p_{\mathcal{T}}^G$ -dense set  $S_G \subset B$ .

Now we can define what is a "complement separating generator".

**Definition 1.** With the above assumptions and notations, we call a generator  $G(z; \cdot)$  a complement separating generator if, for any task  $\mathcal{T} \sim p_{\mathcal{T}}$ ,  $G(z; \mathcal{T})$  satisfies the following two conditions:

- for all  $i = 1, 2, \dots K$ ,  $U_i \cap S_G = \emptyset$ .
- for all  $i, j = 1, 2, \dots K$ ,  $U_i$  and  $U_j$  are pathwise disconnected from each other in  $B \setminus S_G$ .

Then we can formally state the main theorem as:

**Theorem 1.** Let  $G_{\mathcal{T}}$  be a separating complement generator. Denote  $S_{\mathcal{T}}$  the support(training) set and  $F_{\mathcal{T}}$  the generated fake dataset. We assume our learned meta-learner is able to learn a classifier  $D_{\mathcal{T}}$  which obtains strong correct decision boundary on the augmented support set  $(S_{\mathcal{T}}, F_{\mathcal{T}})$ . More precisely, (1) for  $\mathbf{x}, y \in S_{\mathcal{T}}$ ,  $\mathbf{x} \cdot \mathbf{w}_y > \max\{0, \mathbf{x} \cdot \mathbf{w}_i\}$  for all  $i \neq y$ . (2) for  $f(\mathbf{x}) \in F_{\mathcal{T}}$ ,  $f(\mathbf{x}) \cdot \mathbf{w}_i < 0$  for all  $i \leq K$ .

Then if  $|F_{\mathcal{T}}| \rightarrow +\infty$ , then  $D_{\mathcal{T}}$  can almost surely correctly classify all real samples from the data distribution  $p_{\mathcal{T}}(x)$  of the task.

*Proof.* We first need to prove when  $|F_{\mathcal{T}}| \rightarrow +\infty$ , for all  $\mathbf{z} \in S_G$ , we have almost surely  $\max_{i \leq K} \mathbf{w}_i \cdot \mathbf{z} \leq 0$ . The detailed proof is subtle. Here we only give a sketch. From the assumption that  $S_G$  is  $p_{\mathcal{T}}^G$ -dense, one can easily deduce that when  $|F_{\mathcal{T}}| \rightarrow +\infty$ , the points  $F_{\mathcal{T}}$  become dense in  $S_G$ . More precisely, for any  $\epsilon > 0$ , any  $\mathbf{z} \in S_G$ , when  $|F_{\mathcal{T}}| \rightarrow +\infty$ , then almost surely there exists  $\mathbf{z}' \in F_{\mathcal{T}}$ , such that  $|\mathbf{z} - \mathbf{z}'| < \epsilon$ . From the assumption  $\mathbf{w}_i, i = 1, 2 \dots K$  are bounded by a uniform constant  $C$ , we can get almost surely  $\max_{i \leq K} \mathbf{w}_i \cdot \mathbf{z} \leq 0$ .

Then we prove by contradiction. If for any task  $\mathcal{T}$ ,  $D$  successfully adapted to a support set  $(S_{\mathcal{T}}, F_{\mathcal{T}})$ , without loss of generality, we can assume  $S_{\mathcal{T}} = \{(\mathbf{x}_i, y_i)\}_{i=1}^K$  is one-shot. If there is a data

point  $(\mathbf{x}, y)$  which is classifier incorrectly, namely there exists some  $j \neq y$ , such that  $\mathbf{w}_j \cdot f(\mathbf{x}) > \mathbf{w}_y \cdot f(\mathbf{x}) > 0$ . In the mean time  $\mathbf{w}_j \cdot f(\mathbf{x}_j) > 0$ . So for all  $\alpha \in [0, 1]$ ,  $\mathbf{w}_j \cdot [\alpha f(\mathbf{x}_j) + (1-\alpha)f(\mathbf{x})] > 0$ . This contradicts with two facts: 1)  $U_y$  and  $U_j$  are pathwise disconnected from each other in  $B \setminus S_G$ ; 2) almost surely  $\max_{i \leq K} \mathbf{w}_i \cdot \mathbf{z} \leq 0$ , for all  $\mathbf{z} \in S_G$ .

So the theorem is proved.  $\square$

## 2 ALGORITHMS FOR TRAINING METAGAN WITH MAML

We describe the detailed algorithm for training MetaGAN with MAML model as following:

---

### Algorithm 1 MetaGAN with MAML

---

$G(\mathbf{z}, \mathcal{T})$ : **Generator network parameterized by  $\theta_g$ .**

$D(x)$ : **Discriminator network. parameterized by  $\theta_d$ .**

---

Initialize  $\theta_g, \theta_d$  randomly.

**while** not done **do**

    Sample a batch of tasks  $\mathcal{T}_i \sim p(\mathcal{T})$ .

$\triangleright$  Discriminator Update

**for** all  $\mathcal{T}_i$  **do**

        Get  $K$  real samples  $\mathcal{D}_r = \{\mathbf{x}^{(i)}, y^{(i)}\}$  from  $\mathcal{T}_i$ .

        Sample  $K$  generated samples  $\mathcal{D}_f = \{\mathbf{x}^{(j)}\} = G(\mathbf{z}^{(j)}, \mathcal{T}_i)$  from  $G(\mathbf{z}, \mathcal{T}_i)$ .

        Evaluate discriminator loss  $\ell_D^{\mathcal{T}_i}$  with  $\mathcal{D}_r$  and  $\mathcal{D}_f$ .

        Compute adapted discriminator parameters  $\theta'_{d_i} = \theta_d - \alpha \nabla_{\theta_d} \ell_D^{\mathcal{T}_i}$ .

**end for**

    Update  $\theta_d$  using loss  $\mathcal{L}_D$

    Sample a batch of tasks  $\mathcal{T}_i \sim p(\mathcal{T})$ .

$\triangleright$  Generator Update

**for** all  $\mathcal{T}_i$  **do**

        Sample  $K$  generated samples  $\mathcal{D}_f = \{\mathbf{x}^{(j)} = G(\mathbf{z}^{(j)}, \mathcal{T}_i)\}$  from  $G(\mathbf{z}, \mathcal{T}_i)$ .

        Compute adapted discriminator parameters  $\theta'_{d_i} = \theta_d - \alpha \nabla_{\theta_d} L_D$ .

        Compute generator loss gradient  $\nabla_{\theta_g} L_G^{\mathcal{T}_i}$  with the adapted discriminator.

**end for**

    Update generator parameters  $\theta_g$  with accumulated generator loss gradients.

**end while**

---

## 3 GENERATOR AND DISCRIMINATOR ARCHITECTURE

### 3.1 GENERATOR

We describe the generator architecture used in Omniglot models in table 3.2. The generator used in Mini-Imagenet models are similar. Please refer to provided code <sup>1</sup> for more details on the network architecture and training hyperparameters.

### 3.2 DISCRIMINATOR

For both model MetaGAN with MAML and MetaGAN with RN, we adopt the same neural network architecture as MAML and RN respectively.

---

<sup>1</sup><https://github.com/sodabeta7/MetaGAN>

---

$2 \times \{ \text{conv2d } 64 \text{ feature maps with } 3 \times 3 \text{ kernels and Leaky-Relu activations} \}$   
 $\text{conv2d } 64 \text{ feature maps with } 3 \times 3 \text{ kernels, stride 2 and Leaky-Relu activations}$   
 $2 \times \{ \text{conv2d } 128 \text{ feature maps with } 3 \times 3 \text{ kernels and Leaky-Relu activations} \}$   
 $\text{conv2d } 128 \text{ feature maps with } 3 \times 3 \text{ kernels, stride 2 and Leaky-Relu activations}$   
 $2 \times \{ \text{conv2d } 256 \text{ feature maps with } 3 \times 3 \text{ kernels and Leaky-Relu activations} \}$   
 $\text{conv2d } 256 \text{ feature maps with } 3 \times 3 \text{ kernels, stride 2 and Leaky-Relu activations}$   
 $\text{fully-connected layer with 256 units and Leaky-Relu activations}$   
 $\text{sample-dropout and concatenation with number of samples}$   
 $\text{average pooling within each dataset}$   
 $\text{concatenation embedded features with noise input } z$   
 $\text{upsample conv2d } 512 \text{ feature maps with } 3 \times 3 \text{ kernels and Leaky-Relu activations with residual connection}$   
 $\text{upsample conv2d } 256 \text{ feature maps with } 3 \times 3 \text{ kernels and Leaky-Relu activations with residual connection}$   
 $\text{upsample conv2d } 128 \text{ feature maps with } 3 \times 3 \text{ kernels and Leaky-Relu activations with residual connection}$   
 $\text{upsample conv2d } 1 \text{ feature maps with } 3 \times 3 \text{ kernels and Leaky-Relu activations with residual connection}$

Table 1: Omniglot Conditional Generator

## References

- [1] Zihang Dai, Zhilin Yang, Fan Yang, William W Cohen, and Ruslan R Salakhutdinov. Good semi-supervised learning that requires a bad gan. In I. Guyon, U. V. Luxburg, S. Bengio, H. Wallach, R. Fergus, S. Vishwanathan, and R. Garnett, editors, *Advances in Neural Information Processing Systems 30*, pages 6510–6520. Curran Associates, Inc., 2017.
